# Supplementary material for: A study on the hydrogen bonding interaction of the electrospun ladder polyphenylsilsesquioxane/polyisophthalamide composite fibers by ATR FT-IR
Source: Royal Society of Chemistry journal article supplement (doi:10.1039/c0py00274g), 2010-11-09
Supplement: c0py00274g.pdf [file c0py00274g.pdf]

Supporting information for:

**A study on the hydrogen bonding interaction of the electrospun  
ladder polyphenylsilsesquioxane/polyisophthalamide composite  
fibers by ATR FT-IR**

Zhongjie Ren<sup>a</sup>, Rongben Zhang<sup>b</sup>, Shouke Yan<sup>a\*</sup>

<sup>a</sup>State Key laboratory of Chemical Resource Engineering, Beijing University of Chemical Technology, Beijing, China. Tel: (+86)10 6441 3161; E-mail: [skyan@mail.buct.edu.cn](mailto:skyan@mail.buct.edu.cn) <sup>b</sup>Laboratory of Polymer Science and Materials, Beijing National Laboratory for Molecular Sciences (BNLMS), Institute of Chemistry, Chinese Academy of Sciences, Beijing, China.

Supporting figures:

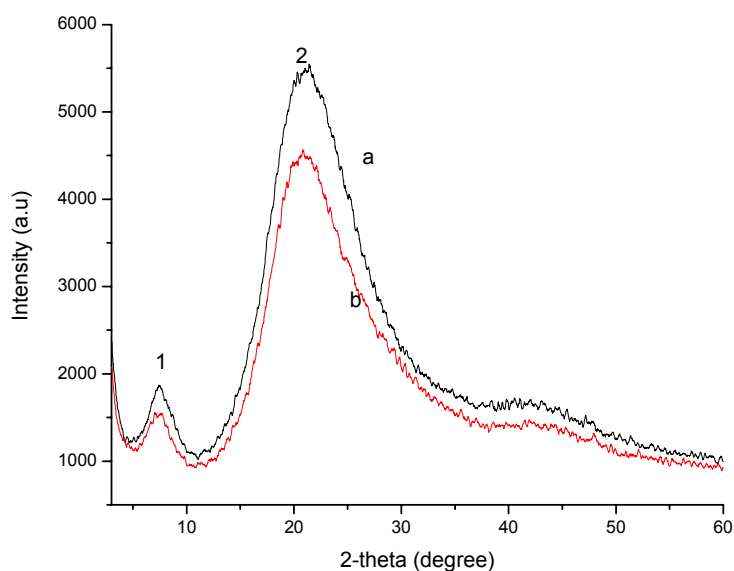

Figure S2 XRD spectra of Ph-LPSQ/C<sub>12</sub>-PA powder (a) and fiber (b).

X-ray diffraction (XRD) was performed on a Rigaku D/max 2400 diffractometer with Cu K $\alpha$  radiation.

XRD spectra of Ph-LPSQ/C<sub>12</sub>-PA powder and fiber display two distinct peaks at  $2\theta \approx 7.25^\circ$  and  $18.3^\circ$  corresponding to the molecular simulated ladder width  $w = 1.22$  nm and the ladder thickness  $t = 0.49$  nm of Ph-LPSQ, respectively. But the signals

associated with the C<sub>12</sub>-PA haven't been detected. So the C<sub>12</sub>-PA is amorphous. The same results are observed for the other Ph-LPSQ/C<sub>n</sub>-PA powder and fiber.

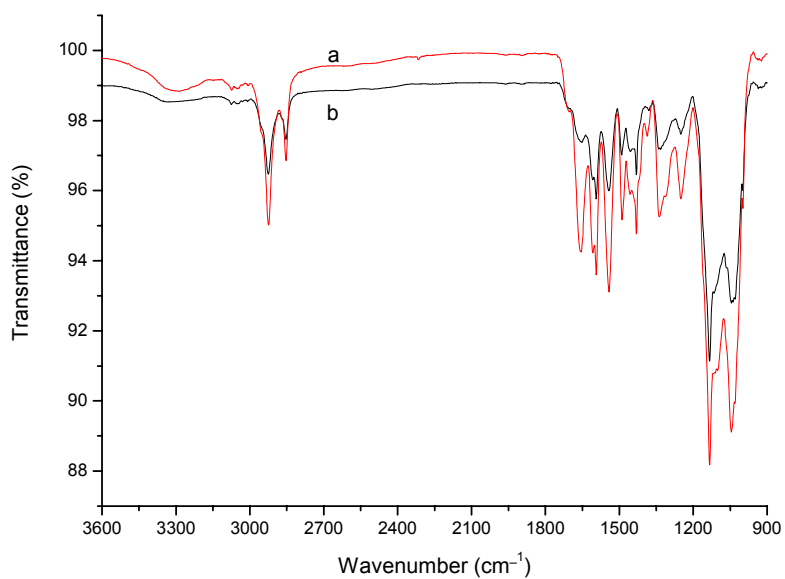

Figure S2 ATR FT-IR spectra in the range of 900-3600 cm<sup>-1</sup> of Ph-LPSQ/C<sub>12</sub>-PA powder (a) and fiber (b).
